# Supplementary material
Source: HighWire-hosted journal article supplement (https://www.ajnr.org/highwire/filestream/52232/field_highwire_adjunct_files/0/2405_table.pdf)
Supplement: 2405_table.pdf [file 2405_table.pdf]

**On-Line Table 1: TNM classification, staging, and 5-year survival for oral cavity tumors<sup>a</sup>**

| T-Primary Tumor |                                                                                                                                                                                                                | N-Regional Lymph Nodes |                                                                                                                                                                                                                                                            | M-Distant Metastasis |                                       |
|-----------------|----------------------------------------------------------------------------------------------------------------------------------------------------------------------------------------------------------------|------------------------|------------------------------------------------------------------------------------------------------------------------------------------------------------------------------------------------------------------------------------------------------------|----------------------|---------------------------------------|
| TX              | Primary tumor cannot be assessed                                                                                                                                                                               | NX                     | Regional lymph nodes cannot be assessed                                                                                                                                                                                                                    | MX                   | Distant metastasis cannot be assessed |
| T0              | No evidence of primary tumor                                                                                                                                                                                   | N0                     | No regional lymph node metastasis                                                                                                                                                                                                                          | M0                   | No distant metastasis                 |
| Tis             | Carcinoma in situ                                                                                                                                                                                              | N1                     | Metastasis in a single ipsilateral lymph node, $\leq 3$ cm in greatest dimension                                                                                                                                                                           | M1                   | Distant metastasis                    |
| T1              | Tumor $\leq 2$ cm in greatest dimension                                                                                                                                                                        | N2                     | Metastasis in a single ipsilateral lymph node, $>3$ cm but not $>6$ cm in greatest dimension; or in multiple ipsilateral lymph nodes, none $>6$ cm in greatest dimension; or in bilateral or contralateral lymph nodes, none $>6$ cm in greatest dimension |                      |                                       |
| T2              | Tumor $>2$ cm but not $>4$ cm in greatest dimension                                                                                                                                                            | N2a                    | Metastasis in single ipsilateral lymph node $>3$ cm but not $>6$ cm in greatest dimension                                                                                                                                                                  |                      |                                       |
| T3              | Tumor $>4$ cm in greatest dimension                                                                                                                                                                            | N2b                    | Metastasis in multiple ipsilateral lymph nodes, none $>6$ cm in greatest dimension                                                                                                                                                                         |                      |                                       |
| T4              | (lip) Tumor invades through cortical bone, inferior alveolar nerve, floor of mouth, or skin of face (ie, chin or nose)                                                                                         | N2c                    | Metastasis in bilateral or contralateral lymph nodes, none $>6$ cm in greatest dimension                                                                                                                                                                   |                      |                                       |
| T4a             | (oral cavity) Tumor invades adjacent structures (eg, through cortical bone, into deep [extrinsic] muscle of tongue [genioglossus, hyoglossus, palatoglossus, and styloglossus], maxillary sinus, skin of face) | N3                     | Metastasis in a lymph node $>6$ cm in greatest dimension                                                                                                                                                                                                   |                      |                                       |
| T4b             | Tumor invades masticator space, pterygoid plates, or skull base and/or encases internal carotid artery                                                                                                         |                        |                                                                                                                                                                                                                                                            |                      |                                       |
| Note            | Superficial erosion alone of bone/tooth socket by gingival primary is not sufficient to classify a tumor as T4                                                                                                 |                        |                                                                                                                                                                                                                                                            |                      |                                       |

<sup>a</sup> Reproduced with permission from the American Joint Committee on Cancer 2010.<sup>17</sup>

**On-Line Table 2: Anatomic stage, prognostic groups and 5-year survival for oral cavity tumors<sup>a</sup>**

| Stage Grouping |       |       |    | 5-Year Survival (%)<br>(Lo et al <sup>18</sup> ) |
|----------------|-------|-------|----|--------------------------------------------------|
| 0              | Tis   | N0    | M0 |                                                  |
| I              | T1    | N0    | M0 | Stage I (75)                                     |
| II             | T2    | N0    | M0 | Stage II (65.6)                                  |
| III            | T3    | N0    | M0 | Stage III (49)                                   |
|                | T1    | N1    | M0 |                                                  |
|                | T2    | N1    | M0 |                                                  |
| IVA            | T3    | N1    | M0 |                                                  |
|                | T4a   | N0    | M0 | Stage IV (30)                                    |
|                | T4a   | N1    | M0 |                                                  |
|                | T1    | N2    | M0 |                                                  |
| IVB            | T2    | N2    | M0 |                                                  |
|                | T3    | N2    | M0 |                                                  |
|                | T4a   | N2    | M0 |                                                  |
| IVC            | Any T | N3    | M0 |                                                  |
|                | T4b   | Any N | M0 |                                                  |
| IVC            | Any T | Any N | M1 |                                                  |

<sup>a</sup> Reproduced with permission from the American Joint Committee on Cancer 2010.<sup>17</sup>
